# Supplementary material
Source: MDPI journal article supplement (https://www.mdpi.com/2410-3888/6/4/67)
Supplement: s1 [file s1]

## Article

# Using Isotopic Data to Evaluate *Esox lucius* (Linnaeus, 1758) Natal Origins in a Hydrologically Complex River Basin

Ryan M. Fitzpatrick <sup>1,\*</sup>, Dana L. Winkelman <sup>2</sup> and Brett M. Johnson <sup>3</sup>

<sup>1</sup> Colorado Parks and Wildlife, 317 West Prospect Rd., Fort Collins, CO 80526, USA

<sup>2</sup> U.S. Geological Survey, Colorado Cooperative Fish and Wildlife Research Unity, 1484 Campus Delivery, Fort Collins, CO 80523, USA; dana.winkelman@colostate.edu

<sup>3</sup> Department of Fish, Wildlife, and Conservation Biology, Colorado State University, 1474 Campus Delivery, Fort Collins, CO 80523, USA; brett.johnson@colostate.edu

\* Correspondence: ryan.fitzpatrick@state.co.us; Tel.: +1-970-472-4336

**USGS Disclaimer:** This draft manuscript is distributed solely for the purposes of the scientific review process. Its content is deliberative and predecisional, so it must not be disclosed or released by reviewers. Because the manuscript has not yet been approved for publication by the U.S. Geological Survey (USGS), it does not represent official USGS findings or policy.

## 1. Elemental Data

| Location   | Year | Mn55   | Sr86     | Ba137  |
|------------|------|--------|----------|--------|
| Stagecoach | 2005 | 20.324 | 763.104  | 28.852 |
| Stagecoach | 2005 | 34.398 | 866.158  | 40.835 |
| Stagecoach | 2005 | 70.593 | 913.781  | 36.405 |
| Stagecoach | 2005 | 53.361 | 1036.753 | 49.028 |
| Stagecoach | 2005 | 17.529 | 701.045  | 19.038 |
| Stagecoach | 2005 | 44.768 | 879.636  | 43.498 |
| Stagecoach | 2005 | 36.278 | 825.430  | 24.139 |
| Stagecoach | 2005 | 23.874 | 805.149  | 27.241 |
| Stagecoach | 2005 | 40.747 | 939.098  | 44.213 |
| Stagecoach | 2005 | 16.264 | 697.720  | 15.756 |
| Stagecoach | 2005 | 31.258 | 834.163  | 31.259 |
| Stagecoach | 2005 | 24.577 | 868.910  | 36.051 |
| Stagecoach | 2005 | 35.382 | 777.894  | 32.686 |
| Stagecoach | 2005 | 21.485 | 765.667  | 18.254 |
| Stagecoach | 2005 | 11.722 | 669.086  | 22.876 |
| Stagecoach | 2005 | 41.100 | 670.557  | 19.234 |
| Stagecoach | 2005 | 39.317 | 703.107  | 31.925 |
| Stagecoach | 2005 | 25.277 | 696.244  | 29.151 |
| Stagecoach | 2005 | 23.455 | 711.152  | 38.991 |
| Stagecoach | 2005 | 34.274 | 655.168  | 26.759 |
| Stagecoach | 2005 | 15.619 | 690.728  | 22.168 |
| Stagecoach | 2005 | 34.757 | 665.163  | 21.002 |
| Stagecoach | 2005 | 26.532 | 611.495  | 20.644 |
| Stagecoach | 2005 | 27.853 | 672.936  | 22.467 |
| Stagecoach | 2005 | 29.414 | 790.035  | 34.931 |
| Stagecoach | 2005 | 34.058 | 750.312  | 30.607 |

**Citation:** Fitzpatrick, R.M.; Winkelman, D.L.; Johnson, B.M. Using Isotopic Data to Evaluate *Esox lucius* (Linnaeus, 1758) Natal Origins in a Hydrologically Complex River Basin. *Fishes* **2021**, *6*, 67. <https://doi.org/10.3390/fishes6040067>

Academic Editor: Rafael Miranda

Received: 5 October 2021

Accepted: 10 November 2021

Published: 22 November 2021

**Publisher's Note:** MDPI stays neutral with regard to jurisdictional claims in published maps and institutional affiliations.

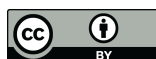

**Copyright:** © 2021 by the authors. Licensee MDPI, Basel, Switzerland. This article is an open access article distributed under the terms and conditions of the Creative Commons Attribution (CC BY) license (<https://creativecommons.org/licenses/by/4.0/>).

|            |      |         |          |        |
|------------|------|---------|----------|--------|
| Stagecoach | 2005 | 18.485  | 706.628  | 28.068 |
| Stagecoach | 2005 | 41.586  | 756.107  | 28.221 |
| Stagecoach | 2005 | 27.693  | 782.193  | 31.684 |
| Stagecoach | 2005 | 34.167  | 771.295  | 40.188 |
| Stagecoach | 2005 | 25.811  | 691.317  | 21.369 |
| Stagecoach | 2005 | 32.935  | 665.496  | 23.701 |
| Stagecoach | 2005 | 14.396  | 537.523  | 14.195 |
| Stagecoach | 2005 | 35.399  | 633.361  | 21.820 |
| Catamount  | 2005 | 50.926  | 518.831  | 45.031 |
| Catamount  | 2005 | 93.035  | 1048.003 | 34.582 |
| Catamount  | 2005 | 26.346  | 584.129  | 40.863 |
| Catamount  | 2005 | 101.374 | 917.580  | 50.147 |
| Catamount  | 2005 | 18.918  | 470.962  | 43.933 |
| Catamount  | 2005 | 59.675  | 638.766  | 70.059 |
| Catamount  | 2005 | 129.083 | 775.585  | 66.930 |
| Catamount  | 2005 | 34.191  | 627.216  | 54.316 |
| Catamount  | 2005 | 15.710  | 513.759  | 47.185 |
| Catamount  | 2005 | 22.022  | 431.300  | 45.037 |
| Catamount  | 2005 | 48.469  | 578.127  | 51.356 |
| Catamount  | 2005 | 17.272  | 374.757  | 25.171 |
| Catamount  | 2005 | 10.121  | 416.533  | 35.984 |
| Catamount  | 2005 | 18.491  | 380.362  | 26.558 |
| Catamount  | 2005 | 20.494  | 431.207  | 28.272 |
| Catamount  | 2005 | 38.687  | 720.097  | 46.115 |
| Catamount  | 2005 | 27.273  | 737.477  | 65.500 |
| Catamount  | 2005 | 23.618  | 388.046  | 39.737 |
| Catamount  | 2005 | 19.071  | 549.954  | 45.980 |
| Catamount  | 2005 | 15.685  | 410.160  | 32.849 |
| Catamount  | 2005 | 23.153  | 321.526  | 28.479 |
| Catamount  | 2005 | 38.587  | 352.946  | 28.936 |
| Catamount  | 2005 | 72.128  | 535.755  | 27.218 |
| Catamount  | 2005 | 22.458  | 369.527  | 23.776 |
| Catamount  | 2005 | 57.048  | 516.547  | 18.723 |
| Catamount  | 2005 | 12.750  | 344.049  | 24.443 |
| Catamount  | 2005 | 19.894  | 379.327  | 26.796 |
| Catamount  | 2005 | 21.175  | 370.289  | 29.146 |
| Catamount  | 2005 | 21.435  | 604.518  | 41.923 |
| Catamount  | 2005 | 15.990  | 318.658  | 23.027 |
| Catamount  | 2005 | 5.821   | 350.694  | 22.553 |
| Catamount  | 2005 | 15.179  | 314.021  | 23.144 |
| Catamount  | 2005 | 17.798  | 370.350  | 26.645 |
| Catamount  | 2005 | 21.745  | 301.890  | 20.180 |
| Catamount  | 2005 | 49.919  | 508.995  | 41.424 |
| Catamount  | 2005 | 48.120  | 708.936  | 24.395 |
| Catamount  | 2005 | 45.495  | 473.201  | 27.121 |
| Catamount  | 2005 | 16.635  | 368.645  | 24.966 |
| Catamount  | 2005 | 185.125 | 826.280  | 43.692 |
| Catamount  | 2005 | 51.849  | 780.432  | 33.651 |
| Catamount  | 2005 | 42.851  | 499.479  | 35.485 |

|            |      |         |          |        |
|------------|------|---------|----------|--------|
| Catamount  | 2005 | 106.554 | 793.792  | 40.878 |
| Catamount  | 2005 | 104.941 | 867.138  | 47.957 |
| Catamount  | 2005 | 151.341 | 776.893  | 32.260 |
| Catamount  | 2005 | 110.975 | 760.890  | 46.856 |
| Catamount  | 2005 | 125.286 | 899.940  | 39.647 |
| Catamount  | 2005 | 84.053  | 654.757  | 40.698 |
| Catamount  | 2005 | 149.333 | 856.087  | 49.902 |
| Catamount  | 2005 | 67.760  | 826.260  | 52.056 |
| Catamount  | 2005 | 111.921 | 773.856  | 49.558 |
| Catamount  | 2005 | 60.637  | 733.112  | 27.760 |
| Catamount  | 2005 | 95.440  | 609.665  | 30.151 |
| Catamount  | 2005 | 54.481  | 898.436  | 29.465 |
| Catamount  | 2005 | 177.479 | 798.309  | 55.521 |
| Catamount  | 2005 | 48.035  | 791.093  | 46.941 |
| Stagecoach | 2006 | 31.853  | 773.574  | 35.274 |
| Stagecoach | 2006 | 45.667  | 913.721  | 48.536 |
| Stagecoach | 2006 | 8.042   | 687.422  | 16.601 |
| Stagecoach | 2006 | 43.105  | 875.347  | 28.404 |
| Stagecoach | 2006 | 41.140  | 649.250  | 21.310 |
| Stagecoach | 2006 | 40.831  | 834.679  | 33.303 |
| Stagecoach | 2006 | 23.455  | 654.397  | 25.917 |
| Stagecoach | 2006 | 21.459  | 769.498  | 30.957 |
| Stagecoach | 2006 | 31.625  | 632.105  | 24.407 |
| Stagecoach | 2006 | 35.152  | 598.084  | 19.304 |
| Stagecoach | 2006 | 67.942  | 712.796  | 36.683 |
| Stagecoach | 2006 | 29.613  | 723.760  | 19.992 |
| Stagecoach | 2006 | 44.219  | 713.404  | 26.402 |
| Stagecoach | 2006 | 32.746  | 761.617  | 25.168 |
| Stagecoach | 2006 | 23.440  | 848.606  | 50.060 |
| Stagecoach | 2006 | 37.460  | 1202.914 | 65.728 |
| Stagecoach | 2006 | 37.109  | 741.248  | 25.934 |
| Stagecoach | 2006 | 46.601  | 937.148  | 35.815 |
| Stagecoach | 2006 | 76.290  | 1016.031 | 36.624 |
| Stagecoach | 2006 | 35.434  | 1077.169 | 49.166 |
| Stagecoach | 2006 | 20.414  | 903.700  | 41.282 |
| Stagecoach | 2006 | 38.230  | 807.084  | 35.343 |
| Stagecoach | 2006 | 40.041  | 580.461  | 17.628 |
| Stagecoach | 2006 | 33.546  | 859.151  | 36.110 |
| Stagecoach | 2006 | 20.477  | 804.630  | 39.098 |
| Stagecoach | 2006 | 26.209  | 901.424  | 37.478 |
| Stagecoach | 2006 | 19.514  | 804.533  | 33.113 |
| Stagecoach | 2006 | 71.737  | 794.693  | 30.454 |
| Stagecoach | 2006 | 51.772  | 587.941  | 21.837 |
| Stagecoach | 2006 | 15.922  | 925.253  | 35.492 |
| Stagecoach | 2006 | 38.168  | 928.438  | 62.636 |
| Stagecoach | 2006 | 67.582  | 762.874  | 27.006 |
| Stagecoach | 2006 | 111.460 | 995.005  | 59.716 |
| Stagecoach | 2006 | 41.182  | 665.863  | 24.383 |
| Stagecoach | 2006 | 21.454  | 660.538  | 20.722 |

|            |      |         |          |        |
|------------|------|---------|----------|--------|
| Stagecoach | 2006 | 49.198  | 751.387  | 40.310 |
| Stagecoach | 2006 | 85.884  | 666.237  | 25.426 |
| Stagecoach | 2006 | 26.895  | 759.772  | 34.834 |
| Stagecoach | 2006 | 36.165  | 608.866  | 26.430 |
| Stagecoach | 2006 | 27.984  | 591.981  | 11.914 |
| Catamount  | 2006 | 42.999  | 942.076  | 56.474 |
| Catamount  | 2006 | 39.413  | 808.961  | 34.136 |
| Catamount  | 2006 | 84.766  | 849.038  | 31.948 |
| Catamount  | 2006 | 48.108  | 823.513  | 34.516 |
| Catamount  | 2006 | 59.847  | 733.033  | 58.448 |
| Catamount  | 2006 | 52.950  | 1033.655 | 55.767 |
| Catamount  | 2006 | 38.002  | 721.008  | 49.495 |
| Catamount  | 2006 | 40.446  | 1014.368 | 57.585 |
| Catamount  | 2006 | 74.848  | 1026.493 | 46.232 |
| Catamount  | 2006 | 99.258  | 908.062  | 42.550 |
| Catamount  | 2006 | 77.989  | 954.313  | 85.795 |
| Catamount  | 2006 | 58.964  | 985.550  | 42.574 |
| Catamount  | 2006 | 53.731  | 1093.280 | 47.241 |
| Catamount  | 2006 | 43.559  | 1032.296 | 50.235 |
| Catamount  | 2006 | 35.113  | 811.681  | 45.649 |
| Catamount  | 2006 | 55.837  | 1029.241 | 47.506 |
| Catamount  | 2006 | 35.559  | 764.130  | 43.790 |
| Catamount  | 2006 | 36.068  | 807.492  | 31.518 |
| Catamount  | 2006 | 34.871  | 872.182  | 45.527 |
| Catamount  | 2006 | 26.813  | 686.007  | 52.081 |
| Catamount  | 2006 | 46.980  | 1087.368 | 46.209 |
| Catamount  | 2006 | 42.008  | 1040.875 | 36.831 |
| Catamount  | 2006 | 34.435  | 585.618  | 74.376 |
| Catamount  | 2006 | 44.064  | 908.658  | 44.572 |
| Catamount  | 2006 | 41.650  | 738.721  | 26.622 |
| Catamount  | 2006 | 51.968  | 808.868  | 53.088 |
| Catamount  | 2006 | 107.016 | 962.095  | 41.622 |
| Catamount  | 2006 | 81.382  | 877.904  | 36.896 |
| Catamount  | 2006 | 22.297  | 498.704  | 39.680 |
| Catamount  | 2006 | 38.016  | 809.371  | 39.240 |
| Catamount  | 2006 | 230.753 | 226.130  | 7.064  |
| Catamount  | 2006 | 71.506  | 1260.247 | 56.264 |
| Catamount  | 2006 | 52.937  | 1211.269 | 72.687 |
| Catamount  | 2006 | 38.604  | 903.940  | 48.448 |
| Catamount  | 2006 | 90.440  | 932.520  | 39.711 |
| Catamount  | 2006 | 49.000  | 828.342  | 30.689 |
| Catamount  | 2006 | 54.117  | 1142.473 | 65.661 |
| Catamount  | 2006 | 38.906  | 752.066  | 47.027 |
| Catamount  | 2006 | 45.933  | 924.938  | 65.295 |
| Catamount  | 2006 | 50.100  | 1009.132 | 58.015 |
| Catamount  | 2006 | 150.197 | 924.563  | 44.768 |
| Stagecoach | 2007 | 91.448  | 854.314  | 22.279 |
| Stagecoach | 2007 | 59.727  | 881.944  | 21.944 |
| Stagecoach | 2007 | 17.196  | 911.530  | 25.526 |

|            |      |         |          |        |
|------------|------|---------|----------|--------|
| Stagecoach | 2007 | 86.030  | 962.731  | 32.327 |
| Stagecoach | 2007 | 42.710  | 891.953  | 21.615 |
| Stagecoach | 2007 | 31.418  | 843.176  | 21.985 |
| Stagecoach | 2007 | 160.865 | 935.328  | 26.767 |
| Stagecoach | 2007 | 51.977  | 830.831  | 19.540 |
| Stagecoach | 2007 | 110.848 | 925.820  | 37.135 |
| Stagecoach | 2007 | 57.073  | 910.991  | 24.979 |
| Stagecoach | 2007 | 46.234  | 940.291  | 26.943 |
| Stagecoach | 2007 | 43.443  | 829.512  | 25.092 |
| Stagecoach | 2007 | 36.228  | 880.968  | 21.611 |
| Stagecoach | 2007 | 51.308  | 965.911  | 25.931 |
| Stagecoach | 2007 | 164.110 | 943.946  | 35.573 |
| Stagecoach | 2007 | 31.706  | 785.424  | 17.871 |
| Stagecoach | 2007 | 89.448  | 907.448  | 23.827 |
| Stagecoach | 2007 | 30.700  | 936.489  | 12.306 |
| Stagecoach | 2007 | 42.238  | 867.226  | 18.219 |
| Stagecoach | 2007 | 25.251  | 962.344  | 19.822 |
| Stagecoach | 2007 | 9.616   | 714.337  | 10.470 |
| Stagecoach | 2007 | 18.650  | 1019.911 | 35.100 |
| Catamount  | 2007 | 83.183  | 1257.562 | 31.846 |
| Catamount  | 2007 | 193.909 | 1637.068 | 63.932 |
| Catamount  | 2007 | 39.234  | 1190.012 | 23.139 |
| Catamount  | 2007 | 126.822 | 1226.497 | 47.478 |
| Catamount  | 2007 | 80.594  | 1057.477 | 43.184 |
| Catamount  | 2007 | 59.551  | 1457.254 | 46.477 |
| Catamount  | 2007 | 250.957 | 1175.061 | 48.242 |
| Catamount  | 2007 | 136.576 | 1460.523 | 53.146 |
| Catamount  | 2007 | 72.573  | 1328.859 | 44.403 |
| Catamount  | 2007 | 114.947 | 1508.840 | 84.469 |
| Catamount  | 2007 | 57.060  | 1455.840 | 38.514 |
| Catamount  | 2007 | 72.629  | 1443.396 | 40.166 |
| Catamount  | 2007 | 243.920 | 1294.860 | 48.520 |
| Catamount  | 2007 | 101.882 | 1322.277 | 32.008 |
| Catamount  | 2007 | 74.358  | 983.434  | 43.477 |
| Catamount  | 2007 | 193.812 | 1537.734 | 69.389 |
| Catamount  | 2007 | 99.655  | 1090.807 | 32.396 |
| Catamount  | 2007 | 167.949 | 1274.462 | 40.272 |
| Catamount  | 2007 | 172.559 | 1254.795 | 38.713 |
| Catamount  | 2007 | 173.185 | 1221.791 | 36.397 |
| Catamount  | 2007 | 180.215 | 1316.025 | 48.803 |
| Catamount  | 2007 | 130.832 | 728.321  | 39.468 |
| Catamount  | 2007 | 68.662  | 838.691  | 23.267 |
| Catamount  | 2007 | 196.545 | 1069.410 | 36.793 |
| Catamount  | 2007 | 112.768 | 1158.892 | 29.609 |
| Catamount  | 2007 | 90.065  | 1295.298 | 37.501 |
| Catamount  | 2007 | 92.268  | 1081.435 | 36.745 |
| Catamount  | 2007 | 171.733 | 1233.986 | 43.784 |
| Catamount  | 2007 | 94.112  | 1005.449 | 31.737 |
| Catamount  | 2007 | 131.709 | 1227.763 | 39.295 |

|           |      |         |          |        |
|-----------|------|---------|----------|--------|
| Catamount | 2007 | 166.335 | 1155.273 | 39.171 |
| Catamount | 2007 | 124.443 | 1307.793 | 38.971 |
| Catamount | 2007 | 137.140 | 1204.008 | 36.281 |
| Catamount | 2007 | 81.880  | 1386.680 | 36.113 |
| Catamount | 2007 | 54.388  | 843.345  | 38.670 |
| Catamount | 2007 | 103.952 | 1166.826 | 31.917 |
| Catamount | 2007 | 102.453 | 1036.437 | 42.979 |
| Catamount | 2007 | 231.659 | 1283.416 | 41.083 |
| Catamount | 2007 | 143.618 | 1283.791 | 39.767 |
| Catamount | 2007 | 148.929 | 1260.352 | 39.233 |
| Catamount | 2007 | 91.205  | 915.422  | 40.312 |
| Catamount | 2007 | 116.758 | 1041.034 | 32.714 |
| Catamount | 2007 | 139.213 | 1326.903 | 37.002 |
| Catamount | 2007 | 56.139  | 1129.337 | 32.191 |
| Catamount | 2007 | 116.846 | 1278.205 | 71.965 |
| Catamount | 2007 | 133.617 | 1286.528 | 34.861 |
| Catamount | 2007 | 51.000  | 1119.984 | 28.059 |

## 2. Isotopic data

| Site       | Year | $^{87}\text{Sr}/^{86}\text{Sr}$ ratio |
|------------|------|---------------------------------------|
| Stagecoach | 2005 | 0.70922                               |
| Stagecoach | 2005 | 0.70935                               |
| Stagecoach | 2005 | 0.70931                               |
| Stagecoach | 2005 | 0.70944                               |
| Stagecoach | 2005 | 0.70932                               |
| Stagecoach | 2005 | 0.70934                               |
| Stagecoach | 2005 | 0.70936                               |
| Stagecoach | 2005 | 0.70935                               |
| Stagecoach | 2005 | 0.70934                               |
| Stagecoach | 2005 | 0.70934                               |
| Stagecoach | 2005 | 0.70934                               |
| Stagecoach | 2005 | 0.70930                               |
| Stagecoach | 2005 | 0.70934                               |
| Stagecoach | 2005 | 0.70934                               |
| Stagecoach | 2005 | 0.70930                               |
| Catamount  | 2005 | 0.71073                               |
| Catamount  | 2005 | 0.71060                               |
| Catamount  | 2005 | 0.71110                               |
| Catamount  | 2005 | 0.71077                               |
| Catamount  | 2005 | 0.71076                               |
| Catamount  | 2005 | 0.71083                               |
| Catamount  | 2005 | 0.71076                               |
| Catamount  | 2005 | 0.71064                               |
| Catamount  | 2005 | 0.71070                               |
| Catamount  | 2005 | 0.71070                               |
| Catamount  | 2005 | 0.71042                               |
| Catamount  | 2005 | 0.71035                               |
| Catamount  | 2005 | 0.71101                               |
| Catamount  | 2005 | 0.71077                               |

|            |      |         |
|------------|------|---------|
| Catamount  | 2005 | 0.71220 |
| Catamount  | 2005 | 0.71075 |
| Catamount  | 2005 | 0.71184 |
| Catamount  | 2005 | 0.71073 |
| Stagecoach | 2006 | 0.70934 |
| Stagecoach | 2006 | 0.70938 |
| Stagecoach | 2006 | 0.70934 |
| Stagecoach | 2006 | 0.70950 |
| Stagecoach | 2006 | 0.70932 |
| Stagecoach | 2006 | 0.70930 |
| Stagecoach | 2006 | 0.70956 |
| Stagecoach | 2006 | 0.70941 |
| Stagecoach | 2006 | 0.70936 |
| Stagecoach | 2006 | 0.70941 |
| Stagecoach | 2006 | 0.70932 |
| Stagecoach | 2006 | 0.70949 |
| Stagecoach | 2006 | 0.70942 |
| Stagecoach | 2006 | 0.70925 |
| Stagecoach | 2006 | 0.70933 |
| Catamount  | 2006 | 0.71116 |
| Catamount  | 2006 | 0.71120 |
| Catamount  | 2006 | 0.71097 |
| Catamount  | 2006 | 0.71126 |
| Catamount  | 2006 | 0.71081 |
| Catamount  | 2006 | 0.71127 |
| Catamount  | 2006 | 0.71142 |
| Catamount  | 2006 | 0.71045 |
| Catamount  | 2006 | 0.71103 |
| Catamount  | 2006 | 0.71102 |
| Catamount  | 2006 | 0.71134 |
| Catamount  | 2006 | 0.71085 |
| Catamount  | 2006 | 0.71173 |
| Catamount  | 2006 | 0.71080 |
| Stagecoach | 2007 | 0.70944 |
| Stagecoach | 2007 | 0.70948 |
| Stagecoach | 2007 | 0.70929 |
| Stagecoach | 2007 | 0.70940 |
| Stagecoach | 2007 | 0.70946 |
| Stagecoach | 2007 | 0.70928 |
| Stagecoach | 2007 | 0.70949 |
| Stagecoach | 2007 | 0.70936 |
| Stagecoach | 2007 | 0.70927 |
| Stagecoach | 2007 | 0.70946 |
| Stagecoach | 2007 | 0.70944 |
| Stagecoach | 2007 | 0.70934 |
| Stagecoach | 2007 | 0.70934 |
| Stagecoach | 2007 | 0.70905 |
| Stagecoach | 2007 | 0.70925 |
| Catamount  | 2007 | 0.71145 |

---

|           |      |         |
|-----------|------|---------|
| Catamount | 2007 | 0.71084 |
| Catamount | 2007 | 0.71096 |
| Catamount | 2007 | 0.71146 |
| Catamount | 2007 | 0.71160 |
| Catamount | 2007 | 0.71168 |
| Catamount | 2007 | 0.71080 |
| Catamount | 2007 | 0.71191 |
| Catamount | 2007 | 0.71100 |
| Catamount | 2007 | 0.71128 |
| Catamount | 2007 | 0.71081 |
| Catamount | 2007 | 0.71171 |
| Catamount | 2007 | 0.71174 |
| Catamount | 2007 | 0.71083 |
| Catamount | 2007 | 0.71193 |

---
